# When Primary Antifungal Therapy Fails

Marcio Nucci<sup>1</sup> and John R. Perfect<sup>2</sup>

<sup>1</sup>University Hospital, Universidade Federal do Rio de Janeiro, Brazil; and <sup>2</sup>Department of Medicine, Division of Infectious Diseases, Duke University Medical Center, Durham, North Carolina

(See the editorial commentary by Wingard on pages 1434–5)

The prognosis for persons with invasive fungal infections has improved over the past 2 decades because of the development of new diagnostic tools, a better understanding of the epidemiology and prognostic factors of these infections, and the availability of new antifungal agents. Nevertheless, antifungal therapy failure is still a substantial clinical problem. When this occurs, the clinician is tempted to attribute therapeutic failure to specific drug resistance and then to change therapy or add another antifungal drug to the regimen. However, other factors may play an even greater role in antifungal therapy failure, such as host factors, low concentration of the drug at the site of infection, drug toxicities, wrong diagnosis, and misdiagnosis of failure because of the occurrence of immune reconstitution inflammatory syndrome. In this review, we discuss the differential diagnosis and management of antifungal therapy failure in invasive mycoses, to help clinicians appreciate the meaning of primary antifungal therapy failure.

Invasive fungal infections (IFIs) have become a major complication in medical practice; they occur in different clinical contexts, such as hematopoietic stem cell transplantation, solid organ transplantation, cancer, and AIDS, as well as severely ill patients hospitalized in intensive care units and neonates [1]. IFIs have a major impact on outcome, both in terms of morbidity and mortality. Paralleling the increased incidence of IFIs, new therapeutic antifungal options have become available since the 1990s, including the lipid preparations of amphotericin B, new azoles, and the echinocandins [2]. The availability of these new agents, a better understanding of the epidemiology and prognostic factors of these infections, and the development of new diagnostic tools have contributed to an improvement in the management of IFIs. However, even with these advances, therapy failure is still a substantial clinical problem [3], occurring in 20%–60% of patients with

invasive candidiasis [4–11], in 40%–70% of patients with invasive aspergillosis (IA) [12–15], and in 30%–100% of patients with invasive fusariosis [16]. These figures may vary, depending on the definition of failure, progress of underlying disease, and specific patient population, but whatever the most accurate figure, antifungal treatment failure rates remain substantial.

When antifungal therapy fails, the clinician may be tempted to attribute failure to specific drug resistance and then may change therapy or add another antifungal drug to the regimen. However, direct resistance of a fungal strain to antifungal drugs represents only 1 explanation for therapy failure, and other factors related to the host's underlying disease and/or immune status, drug pharmacokinetics, and pharmacodynamics may play an even greater role. Therefore, we reviewed the incidence, differential diagnosis, and management of antifungal therapy failure in treatment of IFIs, to help clinicians appreciate the importance of primary antifungal therapy failure.

## DEFINITION OF ANTIFUNGAL TREATMENT FAILURE

Antifungal treatment failure should be considered in any patient who presents with clinical progression of an IFI despite the use of antifungal therapy. However,

Received 5 November 2007; accepted 24 December 2007; electronically published 24 March 2008.

Reprints or correspondence: Dr. Marcio Nucci, Hospital Universitário Clementino Fraga Filho, Rua Professor Rodolpho Paulo Rocco, 255 21941-913 Rio de Janeiro, Brazil (mnucci@hucff.ufrj.br).

**Clinical Infectious Diseases** 2008;46:1426–33

© 2008 by the Infectious Diseases Society of America. All rights reserved.

1058-4838/2008/4609-0016\$15.00

DOI: 10.1086/587101

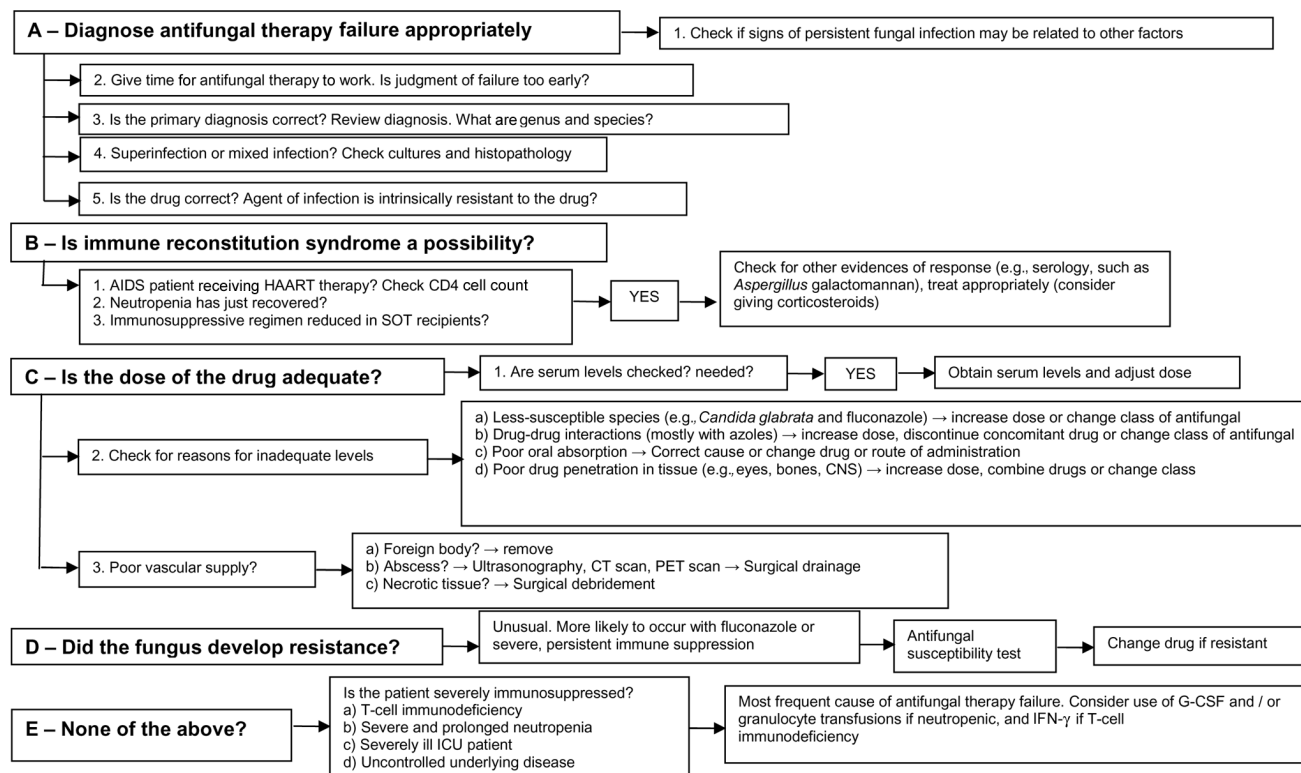

**Figure 1.** Approach to assessment of antifungal therapy failure. G-CSF, granulocyte colony-stimulating factor; ICU, intensive care unit; PET, positron emission tomography; SOT, solid organ transplant.

a precise definition of antifungal therapy failure is, at times, difficult. Because clinical signs and symptoms of an IFI can be nonspecific, the use of these clinical parameters to characterize treatment failure may lead to erroneous interpretations. For example, persistent fever and hypotension despite antifungal treatment in a candidemic patient admitted to an intensive care unit is not necessarily synonymous with treatment failure, because these manifestations may also be attributable to other factors, such as concomitant infections, underlying medical conditions, and comorbidities. In other contexts, the presence of immune reconstitution inflammatory syndrome (IRIS) may result in an exacerbation of inflammatory manifestations of infection and the erroneous interpretation of drug failure [17]. The task becomes easier when the diagnosis is based on a positive culture result and results of additional cultures remain positive. However, because of the general poor sensitivity of cultures in the diagnosis of IFIs, negative culture results do not necessarily mean that the patient is responding to treatment; conversely, the preciseness of when persistent positive culture results define failure is not always clear. In addition, in some patients with tissue involvement, it may be difficult to obtain additional samples for culture or histopathologic examination. In some instances, serological tests may help in evaluating clinical response. This is the case with the polysaccharide antigen

test for histoplasmosis [18]. In addition, recent data suggest that persistently high serum galactomannan titers may correlate with therapy failure in IA [19, 20]. Another problem that complicates the diagnosis of treatment failure is that there are no definitions of the minimum duration of treatment that clinicians should wait to assess therapeutic response. Surely, the response to therapy for candidemia is expected to be quicker than that for IA.

The most organized concepts of success and failure of antifungal therapy are obtained in the randomized clinical trials of antifungal drugs or in studies of salvage therapy. However, even in these studies, different criteria are used, especially in the timing of the end-point evaluation for success. For example, in the majority of studies of candidemia, although success was defined as clinical and microbiological response, the end-point assessment varied, leading to different success rates among the studies [4, 6, 8, 10, 11].

Figure 1 presents a list of questions that may help to approach assessment of antifungal therapy failure. From this list, we can suggest a definition of antifungal therapy failure as a diagnosis of exclusion, as follows: (1) persistence of clinical manifestations of infection at an appropriate time for a given infection (e.g., 2 weeks for candidemia and 6 weeks for IA), (2) primary diagnosis confirmed, (3) superinfection or mixed infection

ruled out, (4) dosage and choice of antifungal drug correct, (5) poor vascular supply ruled out (e.g., abscess, foreign body, and necrotic tissue), and (6) IRIS ruled out.

## FREQUENCY OF THERAPY FAILURE

With the limitations in the definition of antifungal therapy failure, it is difficult to assess its frequency. For example, for the candidemia trials mentioned above, the reported rate of failure had a range of 20%–30% when success was evaluated at the end of treatment [10], 30%–40% after intravenous therapy [6], 30%–45% with time-to-success analysis [11], 40%–50% at day 7 of therapy [8], and 60% when clinical response was assessed after 12 weeks of treatment [4]. In IA, the overall 12-week failure rate of patient treatment with voriconazole was 47.2% but was 68% among allogeneic hematopoietic stem cell transplant recipients [13]. In the final end-point evaluations for treatment failure, substantial differences in certain risk groups reflect the strong impact of host defenses and/or underlying disease on the prognosis.

## DIFFERENTIAL DIAGNOSIS OF TREATMENT FAILURE

**The host.** Host factors are the strongest prognostic factors for IFI and are the most frequent cause of therapy failure (table 1). These factors reflect either the general health of the patient influenced by the underlying disease and its comorbidities (severity-of-illness scores) or the net state of immunosuppression. In candidemia, different severity-of-illness scores have been shown to be independent predictors of poor outcome [11, 21–27]. In patients with hematologic malignancies, persistent neutropenia is a predictor of poor outcome in different IFIs [16, 21, 25, 28], and in hematopoietic stem cell transplant recipients, surrogate markers of severe immunosuppression (e.g., receipt of corticosteroids, graft-versus-host disease, and monocytopenia) are important prognostic factors [29, 30].

By contrast, immune recovery is frequently associated with treatment success, and an example is the ability for HAART to improve the outcome of IFIs without the use of secondary suppressive antifungal treatment [31, 32]. These are clear-cut examples in which failure of treatment is controlled by recovering host immunity. However, what is less certain is how we can effectively use recombinant immune modulators—such as granulocyte colony-stimulating factor, granulocyte-macrophage colony-stimulating factor, granulocyte transfusions, and IFN- $\gamma$ —to prevent antifungal therapy failure. There is no strong evidence-based clinical data to prove the value of immune modulators in established IFIs.

At the opposite side of immunosuppression is IRIS. During an IFI, the changing immune system may overshoot its protective behavior and actually add to disease. IRIS is well characterized during HAART administration in patients with AIDS

**Table 1. Causes of antifungal therapy failure.**

| Causes of antifungal therapy failure                                          |
|-------------------------------------------------------------------------------|
| Host factor                                                                   |
| Severity of illness                                                           |
| Persistence of immunodeficiency (e.g., neutropenia or use of corticosteroids) |
| Primary (intrinsic) drug resistance                                           |
| Wrong diagnosis                                                               |
| Mixed infection                                                               |
| Low concentration of the drug at the site of infection                        |
| Pharmacokinetic and pharmacodynamic                                           |
| Drug interactions                                                             |
| Biofilms                                                                      |
| Poor vascular supply (e.g., abscess and necrotic tissue)                      |
| Drug toxicities (direct and with drug interactions)                           |
| Development of resistance (secondary)                                         |
| Misdiagnosis of failure—immune reconstitution inflammatory syndrome           |

who have IFIs [33], in solid organ transplant recipients with cryptococcosis [34], and in neutropenic patients with rapid neutrophil recovery during management of pulmonary IA [35, 36]. In any situations in which an IFI is being treated and immunity is rapidly changing (e.g., monoclonal antibodies and postpartum), IRIS has the potential to complicate treatment management. With the recurrence of inflammatory signs and symptoms, it either causes the perception of treatment failure or at least confuses the interpretation of successful management. For the clinician, it is necessary to ensure that symptoms and signs are not associated with persistent infection with viable fungal species because of culture results and/or biomarkers, to interpret the clinical presentation and timing, and to consider IRIS, because no specific test is sufficient to correctly diagnose IRIS. Recognition of IRIS might allow a patient to not be categorized as experiencing antifungal therapy failure; in severe cases, the administration of an immunosuppressive or anti-inflammatory agent, such as a corticosteroid, may be necessary.

**The fungus.** Another important cause of treatment failure is the possibility that the fungal species causing disease is intrinsically resistant to the antifungal drug used in the treatment. Examples of intrinsically resistant fungal species include *Candida krusei* (resistant to fluconazole [37]), *Scedosporium apiospermum* (resistant to amphotericin B) [38], *Aspergillus terreus* (resistant to amphotericin B) [39], and zygomycetes (resistant to voriconazole) [40]. With the advent of emerging fungal species, the list of mycoses with primary drug resistance appears to be enlarging (from *Scedosporium prolificans* to *Aspergillus lentulus* [41, 42]). An expert laboratory is critical for the proper identification of strains and, in selected cases, for performing in vitro susceptibility testing for unusual isolates or isolates affecting patients who experience infection relapse. Although

**Table 2. Drugs that significantly decrease the serum levels of antifungal agents.**

| Antifungal agent         | Concomitant drug(s)                                                                               | Action                                                                                                                                                                                                                    |
|--------------------------|---------------------------------------------------------------------------------------------------|---------------------------------------------------------------------------------------------------------------------------------------------------------------------------------------------------------------------------|
| Itraconazole             |                                                                                                   |                                                                                                                                                                                                                           |
| In capsules              | H-2 antagonists and proton pump inhibitors                                                        | Monitor itraconazole serum levels                                                                                                                                                                                         |
| Capsule or oral solution | Rifampin                                                                                          | Consider increasing the dose of itraconazole or choosing alternate drug(s)                                                                                                                                                |
| Fluconazole              | Rifampin                                                                                          | Consider increasing the dose of fluconazole                                                                                                                                                                               |
| Voriconazole             | Rifampin, rifabutin, efavirenz, ritonavir, carbamazepine, long-acting barbiturates, and phenytoin | Contraindicated coadministration with carbamazepine, long-acting barbiturates, rifampin, and rifabutin; with phenytoin and efavirenz, double voriconazole dosage and monitor for increased levels of the concomitant drug |
| Posaconazole             | Cimetidine, rifabutin, and phenytoin                                                              | Avoid concomitant use                                                                                                                                                                                                     |
| Caspofungin              | Rifampin, efavirenz, nevirapine, dexamethasone, phenytoin, and carbamazepine                      | Increase maintenance dose of caspofungin to 70 mg/day                                                                                                                                                                     |

accurate breakpoints are still uncertain except for some yeasts and antifungals, in vitro susceptibility results can be used to appreciate the potential of an antifungal drug's success in treatment.

Failure may also be attributable to the development of drug resistance while a patient is receiving antifungal agents. This has best been chronicled in mucosal candidiasis in patients with AIDS who are treated with azoles [43]. However, outside this context, the rates of resistance among *Candida* isolates causing systemic infection are far less frequent. For example, among 2000 *Candida* bloodstream isolates from 2 trials, the overall rate of resistance to fluconazole was only 6% [44]. The potential importance of antifungal drug resistance as a cause of antifungal therapy failure is further limited by the fact that a good correlation between MICs and clinical outcome has not been clearly established, with the exception of the azoles for candidiasis. With the echinocandins, no correlation between MIC and outcome was observed among 515 *Candida* isolates obtained from patients with esophageal candidiasis and among 231 isolates obtained from patients with invasive candidiasis [45]. Likewise, no correlation was observed between MIC values of different drugs and the outcome for 74 patients with cryptococcosis [46]. With molds, attempts to establish breakpoints have not been successful [47]. Nevertheless, despite these limitations, there are reports of infection due to isolates that develop resistance after exposure to antifungal drugs. The most frequent association is previous use of azoles and infection due to *Candida glabrata* [48, 49]. In addition, there are some reports of an increase in MIC values of isolates of *Candida* species to the echinocandins in patients receiving caspofungin [50–52] and of *Aspergillus* species that develop multiazole resistance after prolonged exposure to azoles [53]. However, systematic susceptibility tests of sequential isolates of *Aspergillus fumigatus* recovered from treated patients suggest that the development of direct resistance during treatment with amphotericin B is uncommon [54]. With regard to *Cryptococcus neoformans*, a

recent study showed that 16 (76%) of 21 relapses of culture-positive relapses of cryptococcal meningitis treated with fluconazole were caused by isolates with reduced susceptibility to fluconazole [55] but may have been associated with the widespread exposure to azoles in a severely immunosuppressed population.

**Access of the drug to the site of infection.** Another reason for failure of antifungal treatment is infection occurring at a body site known to be difficult for fungal eradication, such as certain endovascular infections (e.g., endocarditis, septic thrombophlebitis, osteomyelitis, and endophthalmitis), infection in the CNS, certain deep-tissue abscesses, and infection associated with prosthetic material, with the formation of biofilms. The common feature of most of these infections is a low concentration of the drug at the site of infection, because of pharmacokinetic and/or pharmacodynamic characteristics of the drug (for CNS infections, endophthalmitis, and osteomyelitis), formation of biofilm (for endocarditis, thrombophlebitis, and infection on prosthetic material), or poor vascular supply (for abscess and necrotic tissue). In most instances, a combination of these factors is present, which can amplify the difficulties in successfully clearing an infection and may be major reasons for failure of treatment with a primary antifungal drug.

*Candida* species (and other microorganisms) within biofilm have high MICs against most antifungal drugs [56], although echinocandins and lipid polyenes appear to possess more activity against biofilm yeasts than do azoles [56]. Treatment of infections associated with medical devices frequently fails with antifungal therapy alone and generally requires removal of the device [57]. For this reason, when primary antifungal therapy is failing, the clinician should consider every medical device used in patient care to be the potential cause of treatment failure until proven otherwise.

**Drug kinetics.** Low concentrations of the drug at the site of infection may be caused by fast drug metabolism [58], drug-

**Table 3. Therapy management issues for failure of treatment with specific fungal infections.**

---

|                                                 |
|-------------------------------------------------|
| Therapy management issues for treatment failure |
|-------------------------------------------------|

---

|                                                                                                                                                                                         |
|-----------------------------------------------------------------------------------------------------------------------------------------------------------------------------------------|
| Cryptococcal meningitis                                                                                                                                                                 |
| Acute and chronic intracranial pressure problems can cause treatment failure                                                                                                            |
| Most persistently positive CSF culture results occur because of less aggressive induction therapy                                                                                       |
| Treat with 2–3 weeks of induction therapy with polyene and flucytosine                                                                                                                  |
| Consider microbiological failure if positive CSF culture results at 8–10 weeks of initial therapy                                                                                       |
| If culture results are still positive, test for azole susceptibility and restart with combination antifungal induction therapy                                                          |
| Define agent for clearance phase on the basis of susceptibility                                                                                                                         |
| Consider IFN- $\gamma$ if culture results are persistently positive after repeated induction therapy                                                                                    |
| Consider immune reconstitution inflammatory syndrome; cryptococcal antigen or nonviable yeasts in CSF are not necessarily biomarkers for eventual microbial failure                     |
| Candidemia                                                                                                                                                                              |
| If persistent candidemia, consider removal and/or change catheters and drain abscesses                                                                                                  |
| Compare initial and persistent isolates for in vitro susceptibility to azoles and candins                                                                                               |
| Identify <i>Candida</i> to species level, to predict drug susceptibility and natural history of infection                                                                               |
| Change classes of antifungals (candins, azoles, or polyenes) with retreatment                                                                                                           |
| Invasive aspergillosis                                                                                                                                                                  |
| Identify fungal isolate to species level; attention to drug-resistant strains, such as <i>Aspergillus ustus</i> , <i>Aspergillus terreus</i> , and <i>Aspergillus lentulus</i> [42, 77] |
| Check azole, polyene, and candin in vitro susceptibility                                                                                                                                |
| Check the diagnosis                                                                                                                                                                     |
| Check antifungal drug level in serum (azoles)                                                                                                                                           |
| Consider surgical removal of a large necrotic focus                                                                                                                                     |
| Consider combination therapy or change in individual class of antifungal for retreatment                                                                                                |

---

drug interactions that reduce oral absorption or increase drug metabolism [59], or simply an inadequate dose for the size of the patient, and/or organ dysfunction(s) [60, 61]. With regard to the antifungal dose, the usual fluconazole dose of 400 mg/day for the treatment of invasive candidiasis may be inadequate if the infection is caused by certain strains of *C. glabrata* [62]. Alternatively, there are no precise recommendations for the adequate dose of amphotericin B. For example, a recent study comparing 3 mg/kg/day with 10 mg/kg/day of liposomal amphotericin B for the treatment of IA surprisingly failed to show superiority for the high-dose arm [12]. Nevertheless, in most instances, clinicians increase the dose of a lipid formulation of amphotericin B when the patient is not responding to initial treatment doses. With regard to the echinocandins, a study of candidemia did not show differences in response rates between 2 doses of micafungin (100 mg/day and 150 mg/day) and 1 dose of caspofungin (50 mg/day) [7]. Interestingly, some isolates of *Candida albicans* exhibit a paradoxical growth in vitro and in vivo when exposed to high concentrations of caspofungin [63]. The clinical significance of these in vitro observations is not clear. Therefore, few data remain that support the increase in the dose of an antifungal drug to very high levels as a strategy to improve the outcome after initial failure of therapy for IFIs, despite the widespread acceptance of this strategy. On the other hand, in children, it is more likely that antifungal therapy failure is caused by an inadequate dose, be-

cause, in general, the clearance of these drugs in children is higher than in adults, and the optimal dose of many antifungal agents in children is not well established [60] and is probably insufficient with use of adult guidelines.

Table 2 shows a list of the drug interactions that may significantly reduce serum concentration of antifungal drugs, as well as the recommended actions for each situation. Most of the drug-drug interactions occur with the azoles [59, 64–67], and interactions that may compromise the treatment of the IFI rarely involve the other classes of antifungal drugs, with the exception of caspofungin [68].

Another important area for antifungal drug failure is organ toxicity. This factor may take the form of drug interactions in which an azole may increase levels of tacrolimus or cyclosporine to direct toxic levels in the kidney or hematopoietic system. On the other hand, the antifungal drugs may have direct toxicity on host organs; the most significant example is renal failure associated with amphotericin B [69].

**Wrong diagnosis or mixed infection.** A critical factor that should be checked when the patient is not responding to treatment is whether there was simply a wrong diagnosis. Some IFIs have similar clinical presentations and appearances in tissue. A typical example is zygomycosis in neutropenic patients, with its clinical picture similar to that of IA, with pulmonary nodules and a halo sign [70]. In this context, if voriconazole is started empirically on the basis of a halo sign and persistent neutro-

penia, the patient's condition will not improve. The same clinical scenario is true for a tissue diagnosis of a hyalohyphomycosis caused by a resistant strain. Therefore, lack of response to primary treatment must prompt the physician to reevaluate the diagnosis and to confirm the identification of the fungus. This might require PCR-based techniques in histopathological specimens if culture specimens are not available or fail to grow [71].

Finally, antifungal therapy failure may be caused by mixed infection. Not infrequently, the severely immunosuppressed patient has a combination of bacterial and fungal infections [72], viral and fungal infections [73, 74], or even infection caused by 2 different fungal pathogens [75]. In this context, treating only 1 infection may give an impression of failure of the antifungal drug regimen.

## MANAGEMENT OF ANTIFUNGAL THERAPY FAILURE

The management of antifungal treatment failure is paradoxically both simple and complex (figure 1). The simple part is to ask a series of questions. Is the patient's therapy really failing? Do we have biomarker, radiograph, culture, and/or histopathologic proof of failure? Is there too little immunity or too much? What is clinically happening with the underlying disease? Do we have in vitro susceptibility test results? Do we know the natural course of infection with the identified fungal species? Have there been any antifungal drug administration issues or concerns (i.e., pharmacokinetics, toxicity, drug-drug interactions, and/or site of infection)? Have we given the therapy an appropriate length of time before evaluating for failure?

There is no exact plan for the management of antifungal treatment failure. The condition is heterogeneous and individual dependent, but there are certain principles that are helpful to consider.

1. Most antifungal therapy failures are linked to poorly controlled underlying disease. An appraisal of the management of the underlying disease and its impact on the IFI is essential.
2. Clinicians must make an effort to demonstrate evidence of failure to eliminate viable fungus from tissue or fluid cultures, decreasing or elimination of fungal biomarkers, and/or histopathologic evidence demonstrating removal of fungal species from tissue.
3. There is a need for reassessment, with measurement of drug levels in the blood, of the antifungal drugs administered and a need for optimization of net immune status by either reducing the number of immunosuppressive drugs or adding immune modulators.
4. Surgical removal of infected foci is a "bedside" decision, but for the patient who experiences treatment failure,

surgical removal of infected necrotic tissue might be necessary. In addition, removal of all foreign bodies at the site of infection is encouraged.

5. Dosing changes may be considered, or change to a new antifungal class of drugs may be in order. In addition, depending on the circumstances, the consideration of combination therapy can be entertained for salvage therapy, although robust studies supporting drug combination remain weak [76].

Therapeutic management issues for failure of treatment of several specific fungal species are presented in table 3. These suggestions do not have the strength of guidelines and express, in most instances, our opinion.

## DISCUSSION

Antifungal therapy failure is frequent in IFIs. The clinician frequently attributes therapy failure to specific drug resistance and then changes therapy or adds another antifungal drug to the regimen. However, direct resistance is uncommon, and other factors related to the host's underlying disease and/or immune status and drug pharmacokinetics and pharmacodynamics may play a greater role in antifungal therapy failure. Identification of the most likely reasons for failure is a difficult task but is critical for improvement of the outcome.

## Acknowledgments

**Financial support.** Conselho Nacional de Desenvolvimento Científico e Tecnológico (300235/93-3 to M.N.).

**Potential conflict of interest.** M.N. has received research grants, consulting fees, and honorariums from Pfizer, Astellas, Schering-Plough, and Merck. J.R.P. has received research grants, consulting fees, and honorariums from Pfizer, Astellas, Schering-Plough, Enzon, and Merck.

## References

1. Patterson TF. Advances and challenges in management of invasive mycoses. *Lancet* **2005**;366:1013–25.
2. Kauffman CA. Clinical efficacy of new antifungal agents. *Curr Opin Microbiol* **2006**;9:483–8.
3. Pappas PG, Perfect JR, Cloud GA, et al. Cryptococcosis in human immunodeficiency virus–negative patients in the era of effective azole therapy. *Clin Infect Dis* **2001**;33:690–9.
4. Kullberg BJ, Sobel JD, Ruhnke M, et al. Voriconazole versus a regimen of amphotericin B followed by fluconazole for candidaemia in non-neutropenic patients: a randomised non-inferiority trial. *Lancet* **2005**;366:1435–42.
5. Kuse ER, Chetchotisakd P, da Cunha CA, et al. Micafungin versus liposomal amphotericin B for candidaemia and invasive candidosis: a phase III randomised double-blind trial. *Lancet* **2007**;369:1519–27.
6. Mora-Duarte J, Betts R, Rotstein C, et al. Comparison of caspofungin and amphotericin B for invasive candidiasis. *N Engl J Med* **2002**;347:2020–9.
7. Pappas PG, Rotstein CM, Betts RF, et al. Micafungin versus caspofungin for treatment of candidemia and other forms of invasive candidiasis. *Clin Infect Dis* **2007**;45:883–93.
8. Phillips P, Shafran S, Garber G, et al. Multicenter randomized trial of fluconazole versus amphotericin B for treatment of candidemia in non-

- neutropenic patients. Canadian Candidemia Study Group. *Eur J Clin Microbiol Infect Dis* **1997**; 16:337–45.
9. Reboli AC, Rotstein C, Pappas PG, et al. Anidulafungin versus fluconazole for invasive candidiasis. *N Engl J Med* **2007**; 356:2472–82.
  10. Rex JH, Bennett JE, Sugar AM, et al. A randomized trial comparing fluconazole with amphotericin B for the treatment of candidemia in patients without neutropenia. Candidemia Study Group and the National Institute. *N Engl J Med* **1994**; 331:1325–30.
  11. Rex JH, Pappas PG, Karchmer AW, et al. A randomized and blinded multicenter trial of high-dose fluconazole plus placebo versus fluconazole plus amphotericin B as therapy for candidemia and its consequences in nonneutropenic subjects. *Clin Infect Dis* **2003**; 36:1221–8.
  12. Cornely OA, Maertens J, Bresnik M, et al. Liposomal amphotericin B as initial therapy for invasive mold infection: a randomized trial comparing a high-loading dose regimen with standard dosing (AmBiLoad trial). *Clin Infect Dis* **2007**; 44:1289–97.
  13. Herbrecht R, Denning DW, Patterson TF, et al. Voriconazole versus amphotericin B for primary therapy of invasive aspergillosis. *N Engl J Med* **2002**; 347:408–15.
  14. Bowden R, Chandrasekar P, White MH, et al. A double-blind, randomized, controlled trial of amphotericin B colloidal dispersion versus amphotericin B for treatment of invasive aspergillosis in immunocompromised patients. *Clin Infect Dis* **2002**; 35:359–66.
  15. Ellis M, Spence D, de Pauw B, et al. An EORTC international multicenter randomized trial (EORTC number 19923) comparing two dosages of liposomal amphotericin B for treatment of invasive aspergillosis. *Clin Infect Dis* **1998**; 27:1406–12.
  16. Nucci M, Anaissie EJ, Queiroz-Telles F, et al. Outcome predictors of 84 patients with hematologic malignancies and *Fusarium* infection. *Cancer* **2003**; 98:315–9.
  17. Singh N, Perfect JR. Immune reconstitution syndrome associated with opportunistic mycoses. *Lancet Infect Dis* **2007**; 7:395–401.
  18. Wheat J, Hafner R, Korzun AH, et al. Itraconazole treatment of disseminated histoplasmosis in patients with the acquired immunodeficiency syndrome. AIDS Clinical Trial Group. *Am J Med* **1995**; 98:336–42.
  19. Boutboul F, Alberti C, Leblanc T, et al. Invasive aspergillosis in allogeneic stem cell transplant recipients: increasing antigenemia is associated with progressive disease. *Clin Infect Dis* **2002**; 34:939–43.
  20. Woods G, Miceli MH, Graziutti ML, Zhao W, Barlogie B, Anaissie E. Serum *Aspergillus galactomannan* antigen values strongly correlate with outcome of invasive aspergillosis: a study of 56 patients with hematologic cancer. *Cancer* **2007**; 110:830–4.
  21. Anaissie EJ, Rex JH, Uzun O, Vartivarian S. Predictors of adverse outcome in cancer patients with candidemia. *Am J Med* **1998**; 104:238–45.
  22. Ellis M, Hedstrom U, Jumaa P, Bener A. Epidemiology, presentation, management and outcome of candidemia in a tertiary care teaching hospital in the United Arab Emirates, 1995–2001. *Med Mycol* **2003**; 41:521–8.
  23. Luzzati R, Amalfitan G, Lazzarini L, et al. Nosocomial candidemia in non-neutropenic patients at an Italian tertiary care hospital. *Eur J Clin Microbiol Infect Dis* **2000**; 19:602–7.
  24. Nucci M, Colombo AL, Silveira F, et al. Risk factors for death in patients with candidemia. *Infect Control Hosp Epidemiol* **1998**; 19:846–50.
  25. Nucci M, Silveira MI, Spector N, et al. Risk factors for death among cancer patients with fungemia. *Clin Infect Dis* **1998**; 27:107–11.
  26. Viudes A, Peman J, Canton E, Ubeda P, Lopez-Ribot JL, Gobernado M. Candidemia at a tertiary-care hospital: epidemiology, treatment, clinical outcome and risk factors for death. *Eur J Clin Microbiol Infect Dis* **2002**; 21:767–74.
  27. Weinberger M, Leibovici L, Perez S, et al. Characteristics of candidemia with *Candida-albicans* compared with non-albicans *Candida* species and predictors of mortality. *J Hosp Infect* **2005**; 61:146–54.
  28. Subira M, Martino R, Franquet T, et al. Invasive pulmonary aspergillosis in patients with hematologic malignancies: survival and prognostic factors. *Haematologica* **2002**; 87:528–34.
  29. Cordonnier C, Ribaud P, Herbrecht R, et al. Prognostic factors for death due to invasive aspergillosis after hematopoietic stem cell transplantation: a 1-year retrospective study of consecutive patients at French transplantation centers. *Clin Infect Dis* **2006**; 42:955–63.
  30. Ribaud P, Chastang C, Latge JP, et al. Survival and prognostic factors of invasive aspergillosis after allogeneic bone marrow transplantation. *Clin Infect Dis* **1999**; 28:322–30.
  31. Goldman M, Zackin R, Fichtenbaum CJ, et al. Safety of discontinuation of maintenance therapy for disseminated histoplasmosis after immunologic response to antiretroviral therapy. *Clin Infect Dis* **2004**; 38:1485–9.
  32. Mussini C, Pezzotti P, Miro JM, et al. Discontinuation of maintenance therapy for cryptococcal meningitis in patients with AIDS treated with highly active antiretroviral therapy: an international observational study. *Clin Infect Dis* **2004**; 38:565–71.
  33. Broom J, Woods M, Allworth A. Immune reconstitution inflammatory syndrome producing atypical presentations of cryptococcal meningitis: case report and a review of immune reconstitution-associated cryptococcal infections. *Scand J Infect Dis* **2006**; 38:219–21.
  34. Singh N, Lortholary O, Alexander BD, et al. An immune reconstitution syndrome-like illness associated with *Cryptococcus neoformans* infection in organ transplant recipients. *Clin Infect Dis* **2005**; 40:1756–61.
  35. Todeschini G, Murari C, Bonesi R, et al. Invasive aspergillosis in neutropenic patients: rapid neutrophil recovery is a risk factor for severe pulmonary complications. *Eur J Clin Invest* **1999**; 29:453–7.
  36. Miceli MH, Maertens J, Buve K, et al. Immune reconstitution inflammatory syndrome in cancer patients with pulmonary aspergillosis recovering from neutropenia: proof of principle, description, and clinical and research implications. *Cancer* **2007**; 110:112–20.
  37. Rex JH, Pfaller MA, Galgiani JN, et al. Development of interpretive breakpoints for antifungal susceptibility testing: conceptual framework and analysis of in vitro–in vivo correlation data for fluconazole, itraconazole, and *Candida* infections. Subcommittee on Antifungal Susceptibility Testing of the National Committee for Clinical Laboratory Standards. *Clin Infect Dis* **1997**; 24:235–47.
  38. Cuenca-Estrella M, Ruiz-Diez B, Martinez-Suarez JV, Monzon A, Rodriguez-Tudela JL. Comparative in-vitro activity of voriconazole (UK-109,496) and six other antifungal agents against clinical isolates of *Scedosporium prolificans* and *Scedosporium apiospermum*. *J Antimicrob Chemother* **1999**; 43:149–51.
  39. Hachem RY, Kontoyiannis DP, Boktour MR, et al. *Aspergillus terreus*: an emerging amphotericin B-resistant opportunistic mold in patients with hematologic malignancies. *Cancer* **2004**; 101:1594–600.
  40. Scott LJ, Simpson D. Voriconazole: a review of its use in the management of invasive fungal infections. *Drugs* **2007**; 67:269–98.
  41. Lamarinis GA, Chamilos G, Lewis RE, Safdar A, Raad II, Kontoyiannis DP. *Scedosporium* infection in a tertiary care cancer center: a review of 25 cases from 1989–2006. *Clin Infect Dis* **2006**; 43:1580–4.
  42. Balajee SA, Nickle D, Varga J, Marr KA. Molecular studies reveal frequent misidentification of *Aspergillus fumigatus* by morphotyping. *Eukaryot Cell* **2006**; 5:1705–12.
  43. Ruhne M, Eigler A, Tennagen I, Geiseler B, Engelmann E, Trautmann M. Emergence of fluconazole-resistant strains of *Candida albicans* in patients with recurrent oropharyngeal candidosis and human immunodeficiency virus infection. *J Clin Microbiol* **1994**; 32:2092–8.
  44. Ostrosky-Zeichner L, Rex JH, Pappas PG, et al. Antifungal susceptibility survey of 2,000 bloodstream *Candida* isolates in the United States. *Antimicrob Agents Chemother* **2003**; 47:3149–54.
  45. Kartsonis N, Killar J, Mixson L, et al. Caspofungin susceptibility testing of isolates from patients with esophageal candidiasis or invasive candidiasis: relationship of MIC to treatment outcome. *Antimicrob Agents Chemother* **2005**; 49:3616–23.
  46. Dannaoui E, Abdul M, Arpin M, et al. Results obtained with various antifungal susceptibility testing methods do not predict early clinical outcome in patients with cryptococcosis. *Antimicrob Agents Chemother* **2006**; 50:2464–70.
  47. Lionakis MS, Lewis RE, Chamilos G, Kontoyiannis DP. *Aspergillus* sus-

- ceptibility testing in patients with cancer and invasive aspergillosis: difficultie in establishing correlation between in vitro susceptibility data and the outcome of initial amphotericin B therapy. *Pharmacotherapy* **2005**;25:1174–80.
48. Alexander BD, Schell WA, Miller JL, Long GD, Perfect JR. *Candida glabrata* fungemia in transplant patients receiving voriconazole after fluconazole. *Transplantation* **2005**;80:868–71.
  49. Panackal AA, Gribskov JL, Staab JF, Kirby KA, Rinaldi M, Marr KA. Clinical significance of azole antifungal drug cross-resistance in *Candida glabrata*. *J Clin Microbiol* **2006**;44:1740–3.
  50. Baixench M-T, Aoun N, Desnos-Ollivier M, et al. Acquired resistance to echinocandins in *Candida albicans*: case report and review. *J Antimicrob Chemother* **2007**;59:1076–83.
  51. Hakki M, Staab JF, Marr KA. Emergence of a *Candida krusei* isolate with reduced susceptibility to caspofungin during therapy. *Antimicrob Agents Chemother* **2006**;50:2522–4.
  52. Moudgal V, Little T, Boikov D, Vazquez JA. Multiechinocandin- and multiazole-resistant *Candida parapsilosis* isolates serially obtained during therapy for prosthetic valve endocarditis. *Antimicrob Agents Chemother* **2005**;49:767–9.
  53. Howard SJ, Webster I, Moore CB, et al. Multi-azole resistance in *Aspergillus fumigatus*. *Int J Antimicrob Agents* **2006**;28:450–3.
  54. Dannaoui E, Meletiadis J, Tortorano AM, et al. Susceptibility testing of sequential isolates of *Aspergillus fumigatus* recovered from treated patients. *J Med Microbiol* **2004**;53:129–34.
  55. Bicanic T, Harrison T, Niepieklo A, Dyakopu N, Meintjes G. Symptomatic relapse of HIV-associated cryptococcal meningitis after initial fluconazole monotherapy: the role of fluconazole resistance and immune reconstitution. *Clin Infect Dis* **2006**;43:1069–73.
  56. Kuhn DM, George T, Chandra J, Mukherjee PK, Ghannoum MA. Antifungal susceptibility of *Candida* biofilms unique efficacy of amphotericin B lipid formulations and echinocandins. *Antimicrob Agents Chemother* **2002**;46:1773–80.
  57. Kojic EM, Darouiche RO. *Candida* infections of medical devices. *Clin Microbiol Rev* **2004**;17:255–67.
  58. Mikus G, Schowel V, Drzewinska M, et al. Potent cytochrome P450 2C19 genotype-related interaction between voriconazole and the cytochrome P450 3A4 inhibitor ritonavir. *Clin Pharmacol Ther* **2006**;80:126–35.
  59. Gubbins PO, Amsden JR. Drug-drug interactions of antifungal agents and implications for patient care. *Expert Opin Pharmacother* **2005**;6:2231–43.
  60. Steinbach WJ, Walsh TJ. Mycoses in pediatric patients. *Infect Dis Clin North Am* **2006**;20:663–78.
  61. Hebert MF, Smith HE, Marbury TC, et al. Pharmacokinetics of micafungin in healthy volunteers, volunteers with moderate liver disease, and volunteers with renal dysfunction. *J Clin Pharmacol* **2005**;45:1145–52.
  62. Pappas PG, Rex JH, Sobel JD, et al. Guidelines for treatment of candidiasis. *Clin Infect Dis* **2004**;38:161–89.
  63. Clemons KV, Espiritu M, Parmar R, Stevens DA. Assessment of the paradoxical effect of caspofungin in therapy of candidiasis. *Antimicrob Agents Chemother* **2006**;50:1293–7.
  64. Albengres E, Le LH, Tillement JP. Systemic antifungal agents: drug interactions of clinical significance. *Drug Saf* **1998**;18:83–97.
  65. Panomvana Na Ayudhya D, Thanompuangsee N, Tansuphaswadikul S. Effect of rifampicin on the pharmacokinetics of fluconazole in patients with AIDS. *Clin Pharmacokinet* **2004**;43:725–32.
  66. Johnson LB, Kauffman CA. Voriconazole: a new triazole antifungal agent. *Clin Infect Dis* **2003**;36:630–7.
  67. Greer ND. Posaconazole (Noxafil) a new triazole antifungal agent. *Proc Bayl Univ Med Cent* **2007**;20:188–96.
  68. Maschmeyer G, Glasmacher A. Pharmacological properties and clinical efficacy of a recently licensed systemic antifungal, caspofungin. *Mycoses* **2005**;48:227–34.
  69. Bates DW, Su L, Yu DT, et al. Mortality and costs of acute renal failure associated with amphotericin B therapy. *Clin Infect Dis* **2001**;32:686–93.
  70. Chamilos G, Marom EM, Lewis RE, Lionakis MS, Kontoyiannis DP. Predictors of pulmonary zygomycosis versus invasive pulmonary aspergillosis in patients with cancer. *Clin Infect Dis* **2005**;41:60–6.
  71. Rickerts V, Mousset S, Lambrecht E, et al. Comparison of histopathological analysis, culture, and polymerase chain reaction assays to detect invasive mold infections from biopsy specimens. *Clin Infect Dis* **2007**;44:1078–83.
  72. Alangaden GJ, Wahiduzzaman M, Chandrasekar PH. Aspergillosis: the most common community-acquired pneumonia with gram-negative bacilli as copathogens in stem cell transplant recipients with graft-versus-host disease. *Clin Infect Dis* **2002**;35:659–64.
  73. Wong J, McCracken G, Ronan S, Aronson I. Coexistent cutaneous *Aspergillus* and cytomegalovirus infection in a liver transplant recipient. *J Am Acad Dermatol* **2001**;44:370–2.
  74. Siu YP, Leung KT, Tong MK, Kwok YL, Wong PK, Kwan TH. Fatal case of *Aspergillus* coinfection in a renal transplant recipient suffering from cytomegalovirus pneumonitis. *Nephrology (Carlton)* **2005**;10:619–22.
  75. McLintock LA, Gibson BE, Jones BL. Mixed pulmonary fungal infection with *Aspergillus fumigatus* and *Absidia corymbifera* in a patient with relapsed acute myeloid leukaemia. *Br J Haematol* **2005**;128:737.
  76. Marr KA, Boeckh M, Carter RA, Kim HW, Corey L. Combination antifungal therapy for invasive aspergillosis. *Clin Infect Dis* **2004**;39:797–802.
  77. Panackal AA, Imhof A, Hanley EW, Marr KA. *Aspergillus ustus* infections among transplant recipients. *Emerg Infect Dis* **2006**;12:403–8.
